# Supplementary material for: Determination of Be in alumina by ICP-OES after Carius tube digestion
Source: Royal Society of Chemistry journal article supplement (doi:10.1039/b700486a), 2007-01-01
Supplement: esi.doc [file esi.doc]

This journal © The Royal Society of Chemistry 2007

**Electronic supplementary material**

The *x* value for the standard addition curve, calculated as the mass of the spiked analyte per mass of sample, is listed in the third column of Table 2. The *y* value for the standard addition curve, calculated as the Be/Y intensity ratio multiplied by mass of internal standard per mass of sample is listed in the fourth column of Table 2.

Table 2. Internal standard adjusted spike concentration and Be emission intensity

| Identification | Sample  (bottle #) | X  (adjusted spike, μg/g) | Y  (adjusted intensity) |
| --- | --- | --- | --- |
| S0 - 1 | SRM 699, 1 | 0 | 0.1552 |
| S0 - 2 | SRM 699, 1 | 0 | 0.1519 |
| S1 | SRM 699, 2 | 2.373 | 0.2861 |
| S2 | SRM 699, 3 | 4.044 | 0.3815 |
| S3 | SRM 699, 4 | 6.089 | 0.4992 |
| S4 | SRM 699, 5 | 8.585 | 0.6145 |
| S5 | SRM 699, 6 | 9.562 | 0.6713 |
| Control1 | ST1-5000A | 0 | 0.5590 |
| Control2 | ST1-5000A | 0 | 0.5726 |

Table 3. Definition of terms and the value for each term in equations 1 and 2.

| Term | Definition | XL Function* | Value |
| --- | --- | --- | --- |
| N | Number of observations | COUNT | 7 |
| *m* | Slope of the standard addition curve (from linear regression) | LINEST | 0.05414 g/μg |
| *b* | *y* intercept of the standard addition curve (from linear regression) | LINEST | 0.1571 |
| *c* | Mass fraction of Be in SRM 699 | LINEST | 2.902 μg/g |
|  | Average of the *x* values of the data points for the regression curve | AVERAGE | 4.379 μg/g |
|  | Average of the *y* values of the data points for the regression curve | AVERAGE | 0.3942 |
| *sy* | Standard uncertainty of y estimate: | LINEST | 0.007514 |
| *sb* | Standard uncertainty of b estimate | LINEST | 0.004483 |
| *sm* | Standard uncertainty of m estimate | LINEST | 0.0007922 g/μg |
| *sxx* | , calculated as (N-1) multiplied by the square of the standard deviation of x values of the data points for the regression curve | STDEV | 89.97 (μg/g)2 |

* XL Function: The Microsoft Excel function used to calculate the value of the term.
